# Supplementary material for: The Role of Personalised Choice in Decision Support: A Randomized Controlled Trial of an Online Decision Aid for Prostate Cancer Screening
Source: PLOS journal article supplement (doi:10.1371/journal.pone.0152999), 2016-04-06
Supplement: S3 (10.1371/journal.pone.0152999.s003) [file journal.pone.0152999.s003]

Questions in **bold** text are mandatory. (\*)

|                 |        |
|-----------------|--------|
| Request Number: | 343044 |
| Current Page:   | Review |

## Trial from ANZCTR

|                         |                                   |
|-------------------------|-----------------------------------|
| <b>Trial ID</b>         | ACTRN12612000723886               |
| <b>Trial Status:</b>    | Registered                        |
| <b>Date Submitted:</b>  | 15/06/2011                        |
| <b>Date Registered:</b> | 6/07/2012                         |
|                         | <b>Retrospectively registered</b> |

### Page 1

|                                                                                    |                                                                                                                                                                  |
|------------------------------------------------------------------------------------|------------------------------------------------------------------------------------------------------------------------------------------------------------------|
| <b>Public title</b>                                                                | A randomised controlled trial of an interactive decision aid for prostate cancer screening                                                                       |
| <b>Study title in 'Participant-Intervention-Comparator- Outcome (PICO)' format</b> | A randomised controlled trial of an online interactive decision aid applied to prostate cancer screening for men aged 40 to 69 years, assessing decision quality |
| <b>Secondary ID [1]</b>                                                            | None                                                                                                                                                             |
| UTN                                                                                | U1111-1121-9610                                                                                                                                                  |
| Trial acronym                                                                      | None                                                                                                                                                             |

### Page 2

|                                                   |                            |
|---------------------------------------------------|----------------------------|
| <b>Health condition(s) or problem(s) studied:</b> |                            |
| PSA testing for prostate cancer.                  |                            |
| <b>Condition category:</b>                        | <b>Condition code:</b>     |
| Public Health                                     | Health promotion/education |
| Public Health                                     | Epidemiology               |
| Cancer                                            | Prostate                   |

### Page 3

|                                                   |                                                                                                                                                                                                                                                                                                                                                                                                                                                                                                                                                                                                                                                                                                                                                                                                                                                                                                                                                                                                                                                                                                                                                                                                                                                                                                                |
|---------------------------------------------------|----------------------------------------------------------------------------------------------------------------------------------------------------------------------------------------------------------------------------------------------------------------------------------------------------------------------------------------------------------------------------------------------------------------------------------------------------------------------------------------------------------------------------------------------------------------------------------------------------------------------------------------------------------------------------------------------------------------------------------------------------------------------------------------------------------------------------------------------------------------------------------------------------------------------------------------------------------------------------------------------------------------------------------------------------------------------------------------------------------------------------------------------------------------------------------------------------------------------------------------------------------------------------------------------------------------|
| <b>Descriptions of intervention(s) / exposure</b> | <p>We have developed an online decision aid ('My Prostate Cancer Screening Annalisa') for men aged 40 to 69 years. The aid summarises the evidence for the benefits, potential harms and other factors associated with screening and elicits individual participant's preferences for each factor associated with the decision to screen (the benefits, potential harms and other factors).</p> <p>Responses to these questions are used to generate a personalised decision aid for the user.</p> <p>There are two arms of the trial:</p> <p>Control arm: Users are asked to indicate how important 5 attributes of prostate cancer screening (benefits and potential harms) are to them; these were pre-installed by researchers based on literature (RCT data) and a pilot study (i.e. the attributes are fixed). This arm is referred to as My Prostate Cancer Screening Annalisa: Fixed Attributes.</p> <p>Intervention arm: Users are asked to choose the attributes they would like to include in their decision aid, from a total of 10 attributes. That is, users pick their own attributes. This arm is called My Prostate Cancer Screening Annalisa: You Choose. The control decision aid takes about 15 minutes to complete. The intervention decision aid takes about 18 minutes to complete.</p> |
| <b>Intervention Code:</b>                         | Early detection / Screening                                                                                                                                                                                                                                                                                                                                                                                                                                                                                                                                                                                                                                                                                                                                                                                                                                                                                                                                                                                                                                                                                                                                                                                                                                                                                    |
| <b>Intervention Code:</b>                         | Prevention                                                                                                                                                                                                                                                                                                                                                                                                                                                                                                                                                                                                                                                                                                                                                                                                                                                                                                                                                                                                                                                                                                                                                                                                                                                                                                     |
| <b>Comparator / control treatment</b>             | The comparator is the 'fixed attribute' interactive decision aid.                                                                                                                                                                                                                                                                                                                                                                                                                                                                                                                                                                                                                                                                                                                                                                                                                                                                                                                                                                                                                                                                                                                                                                                                                                              |
| <b>Control group</b>                              | Active                                                                                                                                                                                                                                                                                                                                                                                                                                                                                                                                                                                                                                                                                                                                                                                                                                                                                                                                                                                                                                                                                                                                                                                                                                                                                                         |

### Page 4

|                         |                                                                                                                                                                 |
|-------------------------|-----------------------------------------------------------------------------------------------------------------------------------------------------------------|
| <b>Primary Outcome:</b> | Primary outcome: Decision quality as measured by "MyDecisionQuality" an eight point scale that encompasses dimensions of making a high quality health decision. |
| <b>Timepoint:</b>       | Baseline (after completion of interactive decision aid).                                                                                                        |

|                           |                                                                                                                                                                                                                                                                                                                                                                                                                                                                                                                                                                                            |
|---------------------------|--------------------------------------------------------------------------------------------------------------------------------------------------------------------------------------------------------------------------------------------------------------------------------------------------------------------------------------------------------------------------------------------------------------------------------------------------------------------------------------------------------------------------------------------------------------------------------------------|
| <b>Secondary Outcome:</b> | Secondary Outcome 1: The proportion of the intervention and control group who indicate they are more likely to visit their GP to discuss PSA testing after interacting with either the 'Pick Your Own' (PYO) or Fixed Attribute (control group) decision aids. (The PYO version is where participants choose, from a list of 10 attributes, the ones they think are important to them). This will be assessed in the online questionnaire by asking participants to indicate how likely they are to see their GP about PSA testing before and after they use the appropriate decision aid. |
| <b>Timepoint:</b>         | After interaction with the decision aid.                                                                                                                                                                                                                                                                                                                                                                                                                                                                                                                                                   |

#### Page 5

|                               |                                                                                                                          |
|-------------------------------|--------------------------------------------------------------------------------------------------------------------------|
| <b>Key inclusion criteria</b> | 40-69 year old men living in Australia who have access to the internet and a reasonable command of the English language. |
| <b>Minimum age</b>            | 40 Years                                                                                                                 |
| <b>Maximum age</b>            | 69 Years                                                                                                                 |
| <b>Gender</b>                 | Males                                                                                                                    |
| <b>Healthy volunteers?</b>    | Yes                                                                                                                      |
| <b>Key exclusion criteria</b> | No access to the internet, insufficient English, younger than 40 years or older than 69 years.                           |

#### Page 6

|                                                                                                                 |                                                                                                                                                                                                                                                                  |
|-----------------------------------------------------------------------------------------------------------------|------------------------------------------------------------------------------------------------------------------------------------------------------------------------------------------------------------------------------------------------------------------|
| <b>Study type</b>                                                                                               | Interventional                                                                                                                                                                                                                                                   |
| <b>Purpose of the study</b>                                                                                     | Educational / counselling / training                                                                                                                                                                                                                             |
| <b>Allocation to intervention</b>                                                                               | Randomised controlled trial                                                                                                                                                                                                                                      |
| Describe the procedure for enrolling a subject and allocating the treatment (allocation concealment procedures) | Global Market Insite, Inc. (GMI) will recruit 1,398 participants from their panel of 130,000 Australians. Eligible participants who agree to be in the study will be randomly allocated to one of the two arms of the study. This is done centrally by computer. |
| Describe the methods used to generate the sequence in which subjects will be randomised (sequence generation)   | For each of the three age strata simple randomisation is performed using a randomisation table created by computer software (i.e. computerised sequence generation).                                                                                             |
| Masking / blinding                                                                                              | Open (masking not used)                                                                                                                                                                                                                                          |
| Who is / are masked / blinded (choose all that apply)                                                           |                                                                                                                                                                                                                                                                  |
| Assignment                                                                                                      | Parallel                                                                                                                                                                                                                                                         |
| Other design features                                                                                           |                                                                                                                                                                                                                                                                  |
| Type of endpoint (s)                                                                                            | Efficacy                                                                                                                                                                                                                                                         |
| Statistical Methods/Analysis                                                                                    |                                                                                                                                                                                                                                                                  |

#### Page 7

|                                                        |                |
|--------------------------------------------------------|----------------|
| Phase                                                  | Not Applicable |
| <b>Anticipated date of first participant enrolment</b> | 9/06/2011      |
| Date of first participant enrolment                    |                |
| Anticipated date last participant recruited/enrolled   |                |
| Actual date last participant recruited/enrolled        |                |
| <b>Target sample size</b>                              | 1398           |
| <b>Recruitment status</b>                              | Completed      |

#### Recruitment in Australia

|                             |                              |
|-----------------------------|------------------------------|
| <b>Recruitment state(s)</b> | NSW,VIC,ACT,QLD,SA,WA,NT,TAS |
|-----------------------------|------------------------------|

#### Recruitment outside Australia

|                            |                                                                                                                   |
|----------------------------|-------------------------------------------------------------------------------------------------------------------|
| <b>Funding Source:</b>     | Government body                                                                                                   |
| <b>Name:</b>               | National Health and Medical Research Council (NHMRC)                                                              |
| <b>Address:</b>            | Level 1<br>16 Marcus Clarke Street<br>Canberra ACT 2601                                                           |
| <b>Country:</b>            | Australia                                                                                                         |
| <b>Primary Sponsor</b>     | Individual                                                                                                        |
| <b>Name:</b>               | Professor Glenn Salkeld                                                                                           |
| <b>Address:</b>            | A27 - Edward Ford Building<br>The University of Sydney<br>NSW 2006 Australia                                      |
| <b>Country:</b>            | Australia                                                                                                         |
| <b>Secondary Sponsor:</b>  | None                                                                                                              |
| <b>Name:</b>               |                                                                                                                   |
| <b>Address:</b>            |                                                                                                                   |
| <b>Country:</b>            |                                                                                                                   |
| <b>Other Collaborator:</b> | Individual                                                                                                        |
| <b>Name:</b>               | Dr Michelle Cunich                                                                                                |
| <b>Address:</b>            | Sydney Medical School<br>Edward Ford Building (A27)<br>University of Sydney, NSW 2006                             |
| <b>Country:</b>            | Australia                                                                                                         |
| <b>Other Collaborator:</b> | Individual                                                                                                        |
| <b>Name:</b>               | Professor Emeritus Jack Dowie                                                                                     |
| <b>Address:</b>            | Tavistock Place, London School of Hygiene and Tropical Medicine<br>London<br>15-17 Tavistock Place<br>WC1H 9SH UK |
| <b>Country:</b>            | United Kingdom                                                                                                    |
| <b>Other Collaborator:</b> | Individual                                                                                                        |
| <b>Name:</b>               | Dr Kirsten Howard                                                                                                 |
| <b>Address:</b>            | Sydney Medical School<br>Edward Ford Building (A27)<br>University of Sydney, NSW 2006                             |
| <b>Country:</b>            | Australia                                                                                                         |
| <b>Other Collaborator:</b> | Individual                                                                                                        |
| <b>Name:</b>               | Associate Professor Manish Patel                                                                                  |
| <b>Address:</b>            | Westmead Hospital<br>PO Box 533<br>Wentworthville, NSW<br>2145                                                    |
| <b>Country:</b>            | Australia                                                                                                         |
| <b>Other Collaborator:</b> | Individual                                                                                                        |
| <b>Name:</b>               | Professor Graham Mann                                                                                             |
| <b>Address:</b>            | Westmead Millennium Institute for Medical Research<br>PO Box 533<br>Wentworthville, NSW<br>2145                   |
| <b>Country:</b>            | Australia                                                                                                         |

|                                                                            |                                                                                                                                                                                                                                                                                                                                                                                                                                                                                                                                        |
|----------------------------------------------------------------------------|----------------------------------------------------------------------------------------------------------------------------------------------------------------------------------------------------------------------------------------------------------------------------------------------------------------------------------------------------------------------------------------------------------------------------------------------------------------------------------------------------------------------------------------|
| <b>Has the study received approval from at least one Ethics Committee?</b> | Yes                                                                                                                                                                                                                                                                                                                                                                                                                                                                                                                                    |
| <b>Ethics Committee name:</b>                                              | University of Sydney Human Research Ethics Committee                                                                                                                                                                                                                                                                                                                                                                                                                                                                                   |
| <b>Address:</b>                                                            | Level 6<br>Jane Foss Russell Building (G02)<br>The University of Sydney,<br>NSW 2006                                                                                                                                                                                                                                                                                                                                                                                                                                                   |
| <b>Country:</b>                                                            | Australia                                                                                                                                                                                                                                                                                                                                                                                                                                                                                                                              |
| <b>Approval Date:</b>                                                      | 02/06/2011                                                                                                                                                                                                                                                                                                                                                                                                                                                                                                                             |
| <b>Submitted Date:</b>                                                     | 31/03/2011                                                                                                                                                                                                                                                                                                                                                                                                                                                                                                                             |
| <b>HREC:</b>                                                               | 05-2011/13712                                                                                                                                                                                                                                                                                                                                                                                                                                                                                                                          |
| <b>Brief summary</b>                                                       | This study aims to evaluate an online interactive decision aid for prostate cancer screening. Who is it for? You can join this study if you are a male aged 40-69 years who lives in Australia. You must have access to the internet and a reasonable command of the English language. Trial details<br>Participants in this trial will complete an online decision aid for prostate cancer screening. This easy to use interactive decision aid asks men to rate the importance of factors that are relevant to making a high quality |

|                                            |                                                                                                                                                                                                                                                                                                                                                                                                                                                                                                                                                                                                                                                        |
|--------------------------------------------|--------------------------------------------------------------------------------------------------------------------------------------------------------------------------------------------------------------------------------------------------------------------------------------------------------------------------------------------------------------------------------------------------------------------------------------------------------------------------------------------------------------------------------------------------------------------------------------------------------------------------------------------------------|
|                                            | decision, and to weigh up the potential benefits (e.g. avoiding the potential loss of lifetime by early detection of prostate cancer) and harms (e.g. false positive test results and unnecessary treatments) of PSA testing for prostate cancer. Participants will be randomly (by chance) assigned to one of two groups. One group will complete the 'Fixed Attributes' version of the decision aid and the other group will complete the 'You Choose' version. The usefulness of the decision aid will be assessed via a series of questions asking the respondents to rate aspects of the quality of the decision about prostate cancer screening. |
| Trial website                              |                                                                                                                                                                                                                                                                                                                                                                                                                                                                                                                                                                                                                                                        |
| Trial related presentations / publications |                                                                                                                                                                                                                                                                                                                                                                                                                                                                                                                                                                                                                                                        |
| Public Notes                               |                                                                                                                                                                                                                                                                                                                                                                                                                                                                                                                                                                                                                                                        |

#### Principal Investigator

|          |  |
|----------|--|
| Title:   |  |
| Name:    |  |
| Address: |  |
| Country: |  |
| Tel:     |  |
| Fax:     |  |
| Email:   |  |

#### Contact person for public queries

|          |                                                                                 |
|----------|---------------------------------------------------------------------------------|
| Title:   |                                                                                 |
| Name:    | Professor Glenn Salkeld                                                         |
| Address: | Sydney Medical School Edward Ford Building (A27) University of Sydney, NSW 2006 |
| Country: | Australia                                                                       |
| Tel:     | +61 2 9036 9262                                                                 |
| Fax:     | +61 2 9036 9019                                                                 |
| Email:   | glenn.salkeld@sydney.edu.au                                                     |

#### Contact person for scientific queries

|          |                                                                                 |
|----------|---------------------------------------------------------------------------------|
| Title:   |                                                                                 |
| Name:    | Professor Glenn Salkeld                                                         |
| Address: | Sydney Medical School Edward Ford Building (A27) University of Sydney, NSW 2006 |
| Country: | Australia                                                                       |
| Tel:     | +61 2 9036 9262                                                                 |
| Fax:     | +61 2 9036 9019                                                                 |
| Email:   | glenn.salkeld@sydney.edu.au                                                     |

#### Contact person responsible for updating information

|          |                                                                                 |
|----------|---------------------------------------------------------------------------------|
| Title:   |                                                                                 |
| Name:    | Dr Michelle Cunich                                                              |
| Address: | Sydney Medical School Edward Ford Building (A27) University of Sydney, NSW 2006 |
| Country: | Australia                                                                       |
| Tel:     | +61 2 9351 8959                                                                 |
| Fax:     | +61 2 9351 7420                                                                 |
| Email:   | michelle.cunich@sydney.edu.au                                                   |
